# Supplementary material for: Colorimetric determination of hypochlorite with unmodified gold nanoparticles through the oxidation of a stabilizer thiol compound
Source: Royal Society of Chemistry journal article supplement (doi:10.1039/c2an35239g), 2012-01-01
Supplement: c2an35239g.pdf [file c2an35239g.pdf]

## Supporting Information

### Colorimetric determination of hypochlorite with unmodified gold nanoparticles through the oxidation of a stabilizer thiol compound

Jia Zhang, Xiaolei Wang, and Xiurong Yang\*

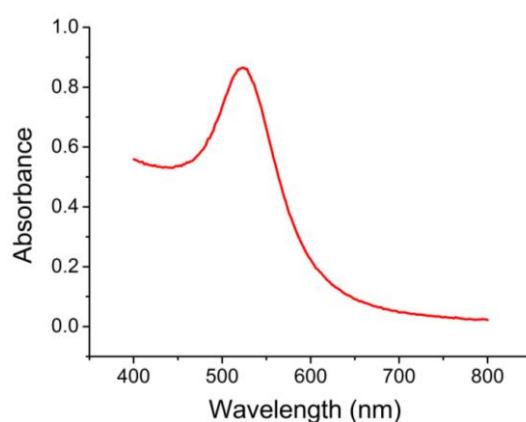

**Fig. S1** Absorption spectra of the buffered Au NP solution after sequential addition of MUA (10  $\mu$ M) and hypochlorite (30  $\mu$ M).

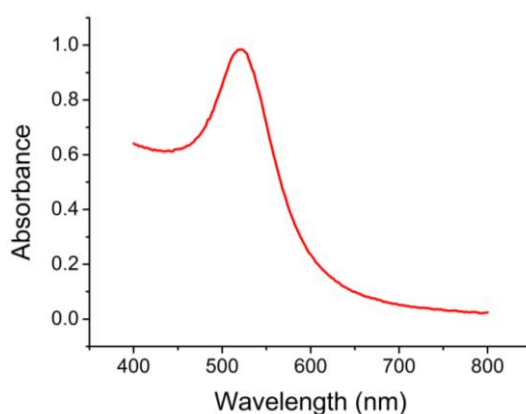

**Fig. S2** Absorption spectra of 13 nm Au NP sensor solution in the presence of 6  $\mu$ M MUA and 100  $\mu$ M  $\text{H}_2\text{O}_2$ .
